# Supplementary material for: Genetic redundancy fuels polygenic adaptation in Drosophila
Source: PubMed Central journal article supplement (PMC6375663; doi:10.1371/journal.pbio.3000128), 2019-02-04

**A**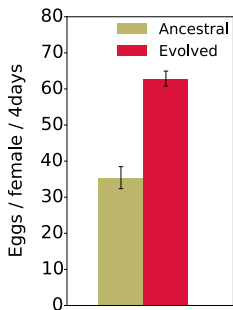**B**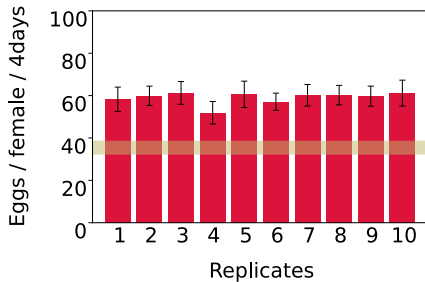**C**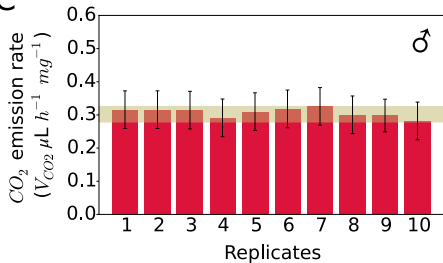**D**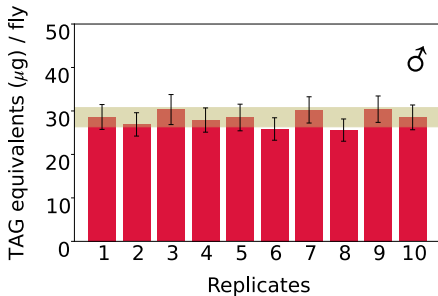

Supplement: pbio.3000128.s001.pdf [file pbio.3000128.s001.pdf]
