# Supplementary material for: Genetic redundancy fuels polygenic adaptation in Drosophila
Source: PubMed Central journal article supplement (PMC6375663; doi:10.1371/journal.pbio.3000128), 2019-02-04

- s: median of replicates with  $\geq 0.1$  AFC
- s: median of replicates with  $\geq 0.2$  AFC
- s: median of replicates with  $\geq 5\%$  ASFC
- s: median of replicates with  $\geq 10\%$  ASFC

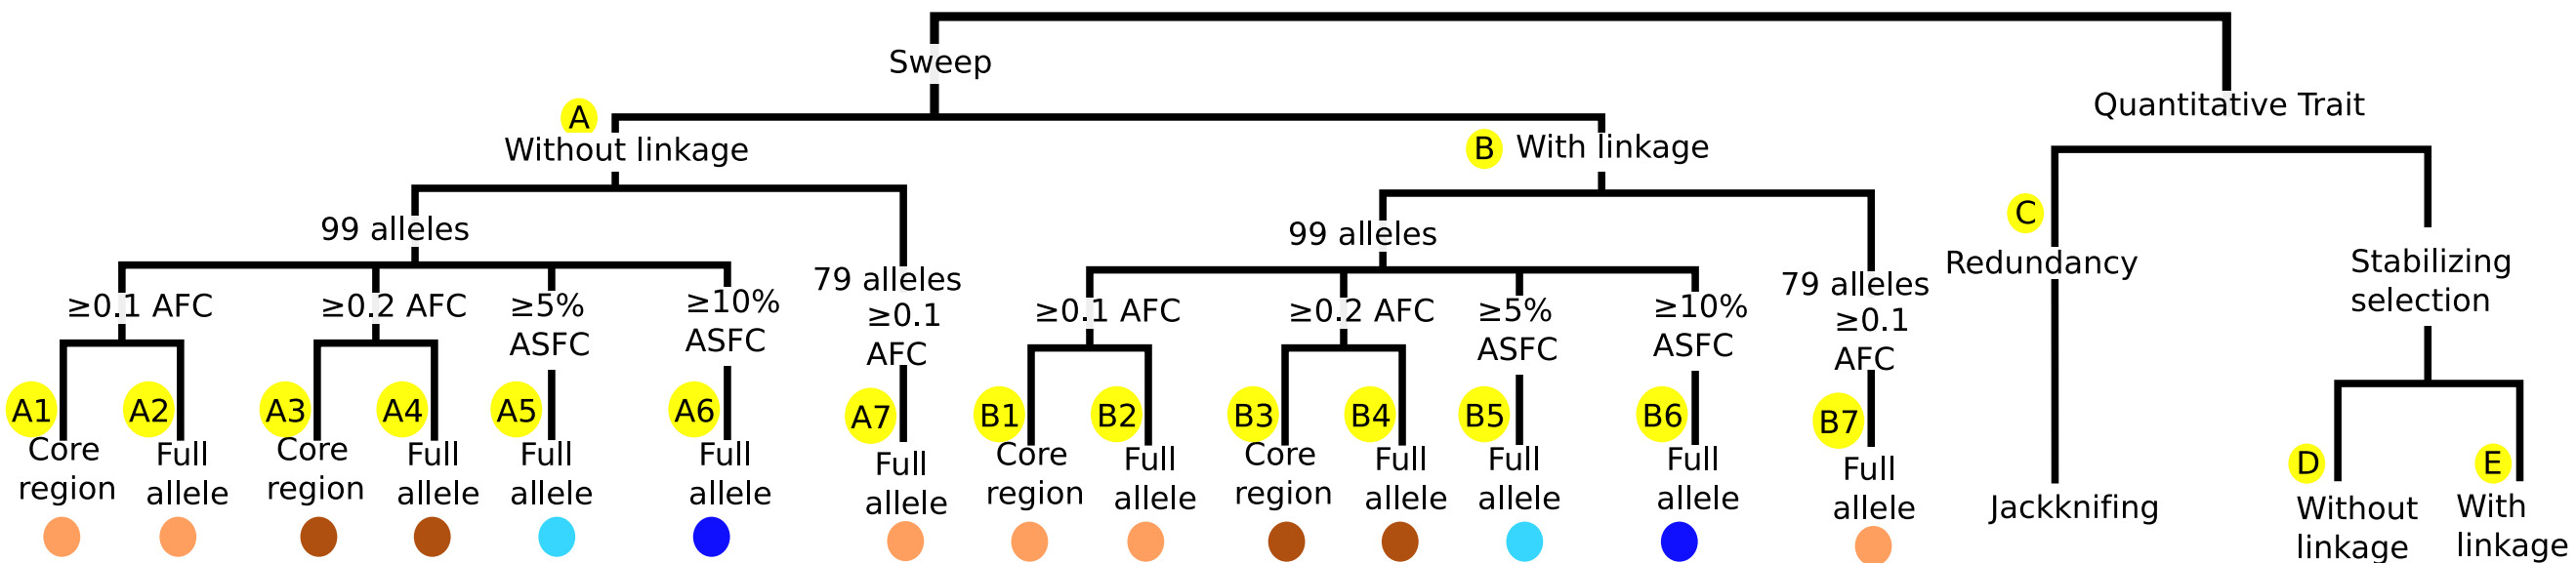

Supplement: pbio.3000128.s004.pdf [file pbio.3000128.s004.pdf]
